# Supplementary material
Source: PubMed Central journal article supplement (PMC10644265)
Supplement: aim-olf-M231756-M23-1756_Supplement.pdf [file aim-olf-M231756-M23-1756_Supplement.pdf]

## Supplemental Material\*

Edelstein GE, Boucau J, Uddin R, et al. SARS-CoV-2 virologic rebound with nirmatrelvir–ritonavir therapy: an observational study. *Ann Intern Med*. 14 November 2023. [Epub ahead of print]. doi:10.7326/M23-1756

### Contents

|                                                                                                                                                                                                                    |    |
|--------------------------------------------------------------------------------------------------------------------------------------------------------------------------------------------------------------------|----|
| Supplement Methods .....                                                                                                                                                                                           | 2  |
| Supplement Figure 1. Sequencing of NSP5 for nirmatrelvir resistance mutations. ....                                                                                                                                | 5  |
| Supplement Figure 2. Decay curves for individuals with virologic rebound. ....                                                                                                                                     | 6  |
| Supplement Figure 3. Decay curves for individuals who experienced symptomatic rebound but not virologic rebound. ....                                                                                              | 7  |
| Supplement Table 1. Clinical characteristics of individuals with immunosuppressing conditions or therapies in the cohort.....                                                                                      | 8  |
| Supplement Table 2. Characteristics of eligible individuals included in the analytic cohort and those excluded from the analytic cohort. ....                                                                      | 9  |
| Supplement Table 3. Sensitivity analyses with inclusion of those who received non-standard N-R therapy, those who received alternate therapies and/or dropped out of the study before 12 days of observation. .... | 11 |
| Supplement Table 4. Median number of days to first culture conversion and to final culture conversion. ....                                                                                                        | 12 |
| Supplement Table 5. Virologic characteristics of individuals experiencing virologic rebound. ....                                                                                                                  | 13 |
| Supplement Table 6A. Validity of symptom rebound to detect virologic rebound in total cohort. ....                                                                                                                 | 14 |
| Supplement Table 6B. Validity of symptom rebound to detect virologic rebound among individuals receiving nirmatrelvir-ritonavir.....                                                                               | 14 |
| Supplement References.....                                                                                                                                                                                         | 15 |

\* This supplemental material was provided by the authors to give readers further details on their article. The material was not copyedited.

## **Supplement Methods**

### *Quantitative Viral Load Assay*

Quantification of SARS-CoV-2 viral load was performed as previously described (1). Anterior nasal swabs were placed in viral transport media (VTM), which was then aliquoted in 250  $\mu$ L and stored at  $-80^{\circ}\text{C}$  until testing. Specimens were thawed and mixed with 10  $\mu$ L of replication-competent avian retrovirus (RCAS) virion as an internal quality control, and the homogenized mixtures were pelleted at 21,000 x g for 2 hours at  $4^{\circ}\text{C}$ . The supernatant was discarded, and 750  $\mu$ L TRIzol-LS Reagent (ThermoFisher Scientific) was added and vortexed for 30 seconds. Following incubation on ice for 10 minutes, 200  $\mu$ L of chloroform (MilliporeSigma) was added, and the mixtures were vortexed for 30 seconds. Phase separation was accomplished via centrifugation at 21,000 x g for 15 minutes at  $4^{\circ}\text{C}$ . The aqueous RNA-containing layer was isolated and added to tubes containing 100  $\mu$ L 3 M Sodium Acetate (Life Technologies) and 1.5  $\mu$ L GlycoBlue Co-precipitant (ThermoFisher Scientific). 300  $\mu$ L of Isopropanol (MilliporeSigma) was added and the mixtures were shaken, incubated in dry ice for 15 minutes, and then centrifuged at 21,000 x g for 45 minutes at  $4^{\circ}\text{C}$  to precipitate RNA pellets. Afterwards the supernatant was discarded, and RNA pellets were washed with 900  $\mu$ L cold 70% ethanol. RNA pellets were resuspended in diethylpyrocarbonate-treated Water (ThermoFisher Scientific) and used for RT-qPCR with the US CDC 2019-nCoV\_N1 primer and probe set (Integrated DNA Technologies). Absolute quantification of viral load was achieved via comparison to a standard curve generated by a 16-fold serial dilution of N1 RNA run on the same plate. All plates contained two non-template control wells and a positive and negative control for N1. The efficiency of the RNA extraction and RT-qPCR amplification was evaluated by quantifying the RCAS RNA recovered from each sample and the two N1 controls. The importin-8 (IPO8) human

housekeeping gene was also amplified and evaluated as a measure of sample collection quality. Samples were run in triplicate wells for N1, and in duplicate wells for RCAS and IPO8.

### *Viral Culture*

Semi-quantitative viral culture was performed in the BSL3 laboratory of the Ragon Institute of MGH, MIT, and Harvard as previously reported (2). Vero-E6 cells (ATCC) were maintained in DMEM (Corning) supplemented with HEPES (Corning), 1X Penicillin/Streptomycin (Corning), 1X Glutamine (Glutamax, ThermoFisher Scientific), and 10% Fetal Bovine serum (FBS) (Sigma), harvested using Trypsin-EDTA (Fisher Scientific) and plated at 20,000 cells per well in 96w plates 16-20 hours before infection. Aliquoted VTM specimens were thawed on ice and filtered through either Spin-X 0.45  $\mu\text{m}$  or 0.65  $\mu\text{m}$  filters (Corning) at 10,000 x g for 5 minutes. 2  $\mu\text{L}$  of the undiluted filtrate was added to four wells of a 96w plate and serially diluted (1:5) in media containing 5  $\mu\text{g}/\text{milliliter}$  (mL) of polybrene (Santa Cruz Biotechnology) before spininfection for 1 hour at 2000 x g at 37°C. Each 96w plate contained wells inoculated with SARS-CoV-2 isolate USA-WA1/2020 strain (BEI Resources) as a positive control and medium only as a negative control. The viral culture plates were scored 7 days post-infection by observation under a light microscope and wells showing cytopathic effect (CPE) counted as positive. A median tissue culture infectious dose (TCID<sub>50</sub>) was calculated using the Spearman-Kärber method. For each well showing CPE, the culture supernatant was harvested for virus expansion and RNA isolation using QIAamp Viral RNA Mini kit (QIAGEN) for confirmation of the viral sequence.

### *SARS-CoV-2 Whole Genome Sequencing*

Whole genome sequencing was carried out using the Illumina COVIDSeq Test protocol as previously described (3). Briefly, DNA libraries were constructed using the Illumina COVIDSeq Test Kit, pooled together, and then quantified with a Qubit High Sensitivity dsDNA kit (Invitrogen). Afterwards, genomic sequencing was performed on an Illumina NextSeq 2000 instrument. Sequenced genomes were demultiplexed and assembled on the Terra platform (app.terra.bio). Complete genomes (sequence assembly length greater than 24000 base pairs) were assigned a Pango lineage (<https://github.com/cov-lineages/pangolin-data>) and deposited to NCBI GenBank under Project Accession PRJNA759255.



**Supplement Figure 2.** Decay curves for individuals with virologic rebound.

The number above each graph corresponds to the participant's study ID. ID 953 (black box) did not receive nirmatrelvir-ritonavir. Abbreviations: TCID50, median tissue culture infectious dose; N-R, nirmatrelvir-ritonavir; IC, immunocompromised (full details are available in Supplement Table 1).

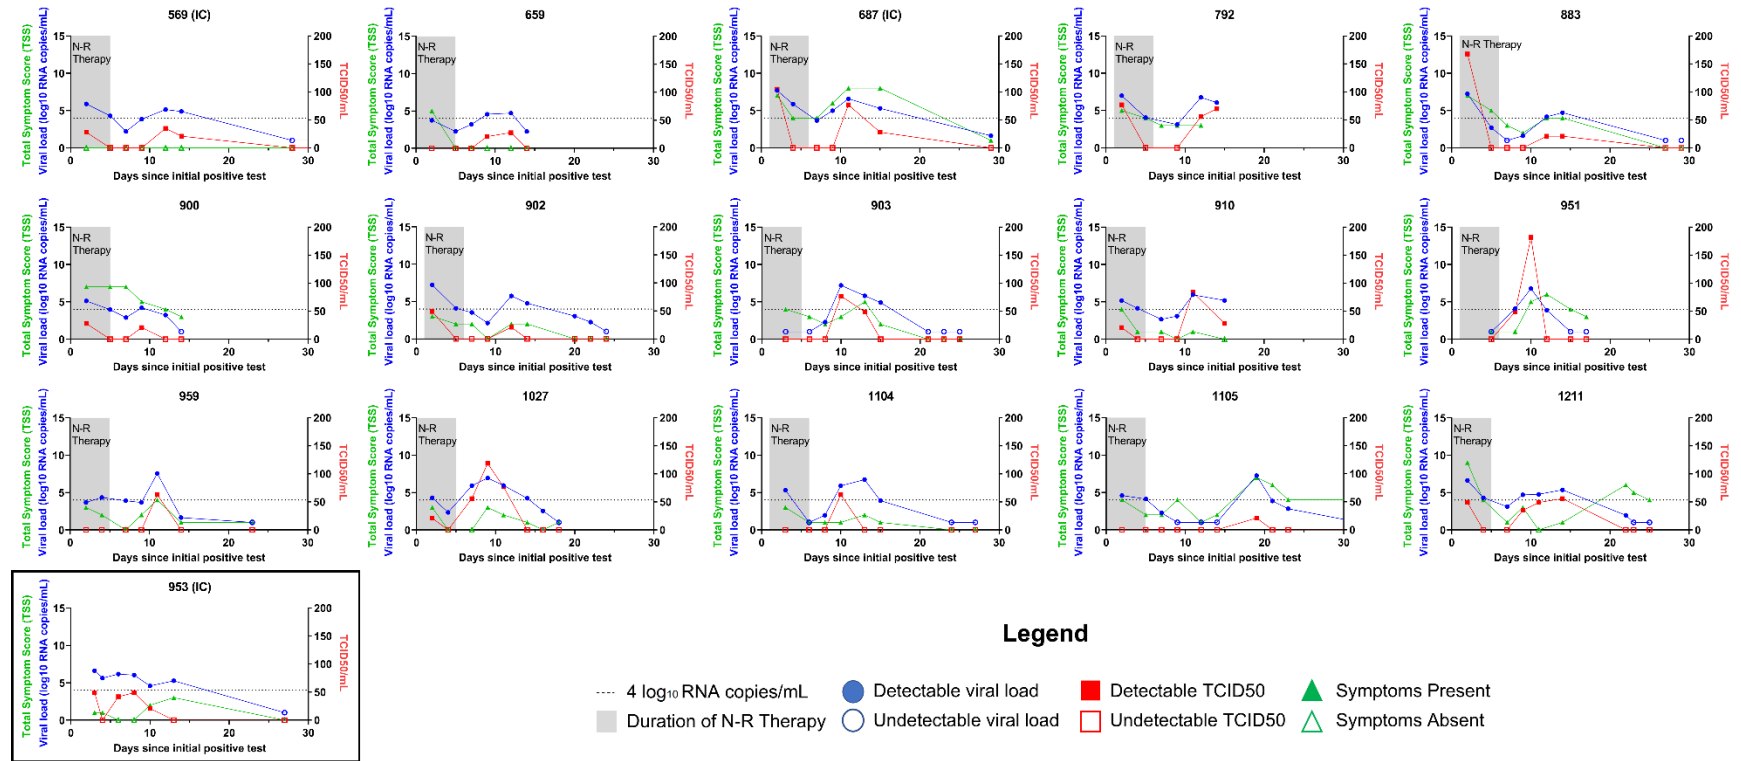

**Supplement Figure 3.** Decay curves for individuals who experienced symptomatic rebound but not virologic rebound.

The number above each graph corresponds to the participant's study ID. Abbreviations: TCID50, median tissue culture infectious dose; N-R, nirmatrelvir-ritonavir; IC, immunocompromised (full details are available in Supplement Table 1).

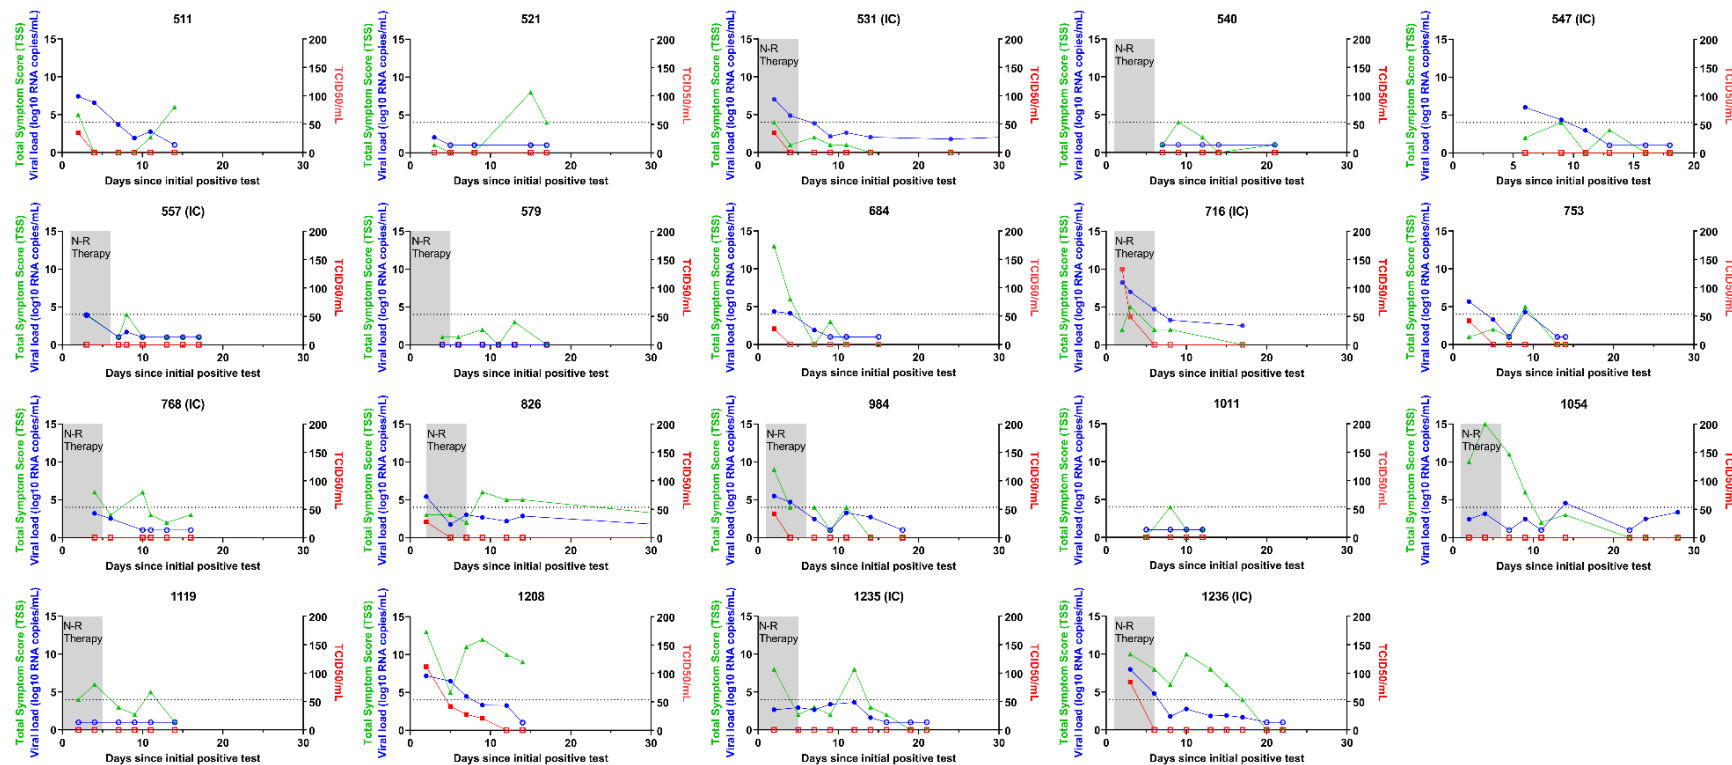

**Legend**

- 4 log<sub>10</sub> RNA copies/mL
- Detectable viral load
- Detectable TCID50
- ▲ Symptoms Present
- (grey) Duration of N-R Therapy
- Undetectable viral load
- Undetectable TCID50
- △ Symptoms Absent

**Supplement Table 1.** Clinical characteristics of individuals with immunosuppressing conditions or therapies in the cohort.

| <b>ID</b> | <b>Diagnosis</b>                                   | <b>Treatment</b>                                   | <b>COVID-19 Therapy</b> |
|-----------|----------------------------------------------------|----------------------------------------------------|-------------------------|
| 475       | Multiple sclerosis                                 | Rituximab within 12 months of COVID-19             | Nirmatrelvir-Ritonavir  |
| 531       | Sarcoidosis                                        | Infliximab                                         | Nirmatrelvir-Ritonavir  |
| 547       | Rheumatoid arthritis                               | Tocilizumab, Methotrexate                          | Untreated               |
| 549       | Bechet's disease                                   | Azathioprine                                       | Nirmatrelvir-Ritonavir  |
| 550       | Rheumatoid arthritis                               | Methotrexate, Hydroxychloroquine                   | Nirmatrelvir-Ritonavir  |
| 551       | Psoriatic arthritis                                | Infliximab                                         | Nirmatrelvir-Ritonavir  |
| 552       | Seronegative spondyloarthropathy                   | Adalimumab, Methotrexate                           | Nirmatrelvir-Ritonavir  |
| 557       | Rheumatoid arthritis, systemic lupus erythematosus | Methotrexate                                       | Nirmatrelvir-Ritonavir  |
| 563       | Rheumatoid arthritis                               | Adalimumab                                         | Nirmatrelvir-Ritonavir  |
| 569       | Systemic lupus erythematosus                       | Hydroxychloroquine, Methylprednisolone daily       | Nirmatrelvir-Ritonavir  |
| 573       | Inflammatory arthritis                             | Adalimumab, Hydroxychloroquine                     | Nirmatrelvir-Ritonavir  |
| 597       | Giant cell arteritis, polymyalgia rheumatica       | Tocilizumab, Prednisone daily                      | Nirmatrelvir-Ritonavir  |
| 658       | Rheumatoid arthritis                               | Tocilizumab                                        | Nirmatrelvir-Ritonavir  |
| 678       | Rheumatoid arthritis                               | Tofacitinib                                        | Nirmatrelvir-Ritonavir  |
| 687       | Systemic lupus erythematosus, rheumatoid arthritis | Hydroxychloroquine, methotrexate                   | Nirmatrelvir-Ritonavir  |
| 691       | Rheumatoid arthritis                               | Rituximab                                          | Nirmatrelvir-Ritonavir  |
| 716       | Rheumatoid arthritis                               | Methotrexate                                       | Nirmatrelvir-Ritonavir  |
| 723       | Multiple sclerosis, acquired hypogammaglobulinemia | IVIG every 4 weeks; Ocrelizumab within 12 months   | Untreated               |
| 725       | Rheumatoid arthritis                               | Infliximab, methotrexate, hydroxychloroquine       | Nirmatrelvir-Ritonavir  |
| 735       | Psoriatic arthritis                                | Adalimumab                                         | Untreated               |
| 768       | Ankylosing spondylitis                             | Secukinumab                                        | Nirmatrelvir-Ritonavir  |
| 805       | Ulcerative colitis, inflammatory arthritis         | Golimumab, methotrexate                            | Nirmatrelvir-Ritonavir  |
| 892       | HIV infection                                      | N/A, on antiretroviral therapy, CD4 cell count>200 | Untreated               |
| 945       | IgG4 related disease                               | Rituximab                                          | Nirmatrelvir-Ritonavir  |
| 952       | Inflammatory arthritis                             | Adalimumab                                         | Nirmatrelvir-Ritonavir  |
| 953       | Rheumatoid arthritis                               | Infliximab, methotrexate, prednisone               | Untreated               |
| 1235      | Psoriatic arthritis                                | Etanercept, methotrexate                           | Nirmatrelvir-Ritonavir  |
| 1236      | Systemic lupus erythematosus                       | Belimumab, methotrexate, prednisone                | Nirmatrelvir-Ritonavir  |



**Supplement Table 2.** Characteristics of eligible individuals included in the analytic cohort and those excluded from the analytic cohort.

Individuals were excluded due to receipt of alternate therapies after enrollment (n=2), receipt of less or more than 5 days of N-R (n=2), or lack of a nasal swab collection more than 11 days from their index diagnostic test (n=11).

| <b>Characteristic</b>                   | <b>Included in<br/>Analytic Cohort<br/>(n=127)</b> | <b>Excluded from<br/>Analytic Cohort<br/>(n=15)</b> | <b>Standardized<br/>difference</b> |
|-----------------------------------------|----------------------------------------------------|-----------------------------------------------------|------------------------------------|
| Age (median/IQR)                        | 53 (35-66)                                         | 49 (36-59)                                          | -0.08                              |
| Missing                                 | 0                                                  | 0                                                   |                                    |
| Gender (n, %)                           |                                                    |                                                     | 0.02                               |
| Female                                  | 96 (76)                                            | 8 (53)                                              |                                    |
| Male                                    | 31 (24)                                            | 7 (47)                                              |                                    |
| Missing                                 | 0                                                  | 0                                                   |                                    |
| Race (n, %)                             |                                                    |                                                     | 0.94                               |
| White                                   | 97 (76)                                            | 6 (40)                                              |                                    |
| Black/AA                                | 12 (9)                                             | 1 (7)                                               |                                    |
| Asian                                   | 5 (4)                                              | 1 (7)                                               |                                    |
| Other                                   | 7 (6)                                              | 3 (20)                                              |                                    |
| Unknown/Missing                         | 6 (5)                                              | 4 (27)                                              |                                    |
| Ethnicity (n, %)                        |                                                    |                                                     | 0.77                               |
| Hispanic/Latino                         | 10 (8)                                             | 3 (20)                                              |                                    |
| Non-Hispanic/Latino                     | 103 (81)                                           | 7 (47)                                              |                                    |
| Other/Unknown/Missing                   | 14 (11)                                            | 5 (33)                                              |                                    |
| COVID-19 Vaccines<br>(median/IQR)       | 4 (3-4)                                            | 3 (0-3)                                             | -0.85                              |
| Missing                                 | 0                                                  | 0                                                   |                                    |
| Days since last vaccine<br>(median/IQR) | 163 (79-253)                                       | 223 (105-371)                                       | 0.40                               |
| Missing                                 | 0                                                  | 0                                                   |                                    |
| Immunosuppression <sup>a</sup> (n, %)   |                                                    |                                                     | 0.11                               |
| Absent                                  | 99 (78)                                            | 11 (73)                                             |                                    |
| Present                                 | 28 (22)                                            | 4 (27)                                              |                                    |
| Missing                                 | 0                                                  | 0                                                   |                                    |
| COVID-19 Variant<br>(n, %)              |                                                    |                                                     | 0.32                               |
| BA.2 <sup>b</sup>                       | 20 (16)                                            | 3 (20)                                              |                                    |
| BA.5 <sup>c</sup>                       | 39 (31)                                            | 4 (27)                                              |                                    |
| XBB <sup>d</sup>                        | 24 (19)                                            | 4 (27)                                              |                                    |
| Other                                   | 5 (4)                                              | 1 (7)                                               |                                    |
| Incomplete <sup>e</sup>                 | 39 (31)                                            | 3 (20)                                              |                                    |

|                                                                  |                  |                  |       |
|------------------------------------------------------------------|------------------|------------------|-------|
| Reason for Baseline Test <sup>f</sup>                            |                  |                  | 0.23  |
| Symptoms                                                         | 110 (87)         | 12 (80)          |       |
| Exposure                                                         | 13 (10)          | 2 (13)           |       |
| Screening                                                        | 3 (2)            | 1 (7)            |       |
| Other                                                            | 1 (1)            | 0 (0)            |       |
| Missing                                                          | 0                | 0                |       |
| Baseline Test Type<br>(n, %)                                     |                  |                  | 0.08  |
| PCR                                                              | 80 (63)          | 10 (67)          |       |
| Rapid Antigen                                                    | 47 (37)          | 5 (33)           |       |
| Missing                                                          | 0                | 0                |       |
| Baseline Test Ct Value<br>(median/IQR)                           | 22.7 (18.5-30.6) | 26.8 (19.6-29.3) | -0.01 |
| Missing                                                          | 71 (56)          | 11 (73)          |       |
| First study viral load in<br>copies/mL (median/IQR)              | 5.1 (3.2-6.3)    | 5.0 (3.7-6.0)    | 0.12  |
| Missing                                                          | 0                | 0                |       |
| Days from index PCR to<br>first study viral load<br>(median/IQR) | 2 (2-3)          | 2 (2-4)          | 0.28  |
| Missing                                                          | 0                | 0                |       |
| Days from Symptom Onset<br>to Baseline Test<br>(median/IQR)      | 1 (1-2)          | 2 (0-3)          | 0.10  |
| Asymptomatic/Missing                                             | 17 (13)          | 3 (20)           |       |

<sup>a</sup> Immunosuppression defined as presence of an immunosuppressing condition or use of an immunosuppressing medication, as determined by physician chart review. Full details of these conditions are available in Supplement Table 1.

<sup>b</sup> Includes BA.2 subvariants

<sup>c</sup> Includes BA.5 subvariants

<sup>d</sup> Includes XBB subvariants

<sup>e</sup> Only genomes with  $\geq 24000$  base pair sequence lengths were considered complete

<sup>f</sup> Participants could select multiple reasons for testing. We categorized them such that symptoms took precedence, followed by exposure, and then asymptomatic screening

**Supplement Table 3.** Sensitivity analyses with inclusion of those who received non-standard N-R therapy, those who received alternate therapies and/or dropped out of the study before 12 days of observation.

|                                                                                                                                                                      | <b>N-R<br/>Rebound<br/>Frequency</b> | <b>No Therapy<br/>Rebound<br/>Frequency</b> | <b>Absolute<br/>Difference<br/>(95%CI)</b> | <b>P-value</b> |
|----------------------------------------------------------------------------------------------------------------------------------------------------------------------|--------------------------------------|---------------------------------------------|--------------------------------------------|----------------|
| Primary Analysis                                                                                                                                                     | 15/72 (20.8%)                        | 1/55 (1.8%)                                 | 19.0% (9.0-29.0%)                          | 0.001          |
| Inclusion of individuals with non-standard N-R regimens*                                                                                                             | 15/74 (20.3%)                        | 1/55 (1.8%)                                 | 18.5% (8.6-28.3%)                          | 0.002          |
| Inclusion of individuals with non-standard N-R regimens, initiation of other antivirals during observation, and/or discontinuation of swab collection before 12 days | 15/76 (19.7%)                        | 2/66 (3.0%)                                 | 16.7% (6.8-26.6%)                          | 0.002          |

\* Includes one individual with 3 days of N-R treatment and one with 15 days N-R of treatment that were not included in the primary analysis

**Supplement Table 4.** Median number of days to first culture conversion and to final culture conversion.

|                  | Median (IQR) days<br>to first negative<br>viral culture | P-value<br>(compared to no<br>therapy group) | Median (IQR) days to final<br>negative viral culture | P-value<br>(compared to no<br>therapy group) |
|------------------|---------------------------------------------------------|----------------------------------------------|------------------------------------------------------|----------------------------------------------|
| No therapy group | 4 (3-6)                                                 | REF                                          | 4 (3-6)                                              | REF                                          |
| All N/R users    | 3 (2-4)                                                 | <0.001                                       | 4 (2-6)                                              | 0.294                                        |
| N/R rebound      | 3 (3-4)                                                 | 0.022                                        | 14 (13-20)*                                          | <0.001                                       |
| N/R no rebound   | 3 (2-4)                                                 | <0.001                                       | 3 (2-4)                                              | <0.001                                       |

\* Two participants with virologic rebound were culture-positive at their last study timepoint

**Supplement Table 5.** Virologic characteristics of individuals experiencing virologic rebound.

| Rebound after nirmatrelvir-ritonavir use |                                                                         |                        |                                         |                                                       |                                                                  |                                 |                             |                          |                                    |                                       |
|------------------------------------------|-------------------------------------------------------------------------|------------------------|-----------------------------------------|-------------------------------------------------------|------------------------------------------------------------------|---------------------------------|-----------------------------|--------------------------|------------------------------------|---------------------------------------|
| ID                                       | Initial viral load nadir (log <sub>10</sub> RNA copies/mL) <sup>a</sup> | Days to initial nadir* | Days to detection of virologic rebound* | Days from end of N-R therapy to detection of rebound* | Viral load peak during rebound (log <sub>10</sub> RNA copies/mL) | Culturable virus during rebound | Any symptoms during rebound | Symptom rebound (TSS ≥3) | Days to final negative viral load* | Days to final negative viral culture* |
| 569                                      | 2.2                                                                     | 7                      | 12                                      | 7                                                     | 5.1                                                              | Yes                             | No                          | No                       | 21                                 | 21                                    |
| 659                                      | 2.3                                                                     | 6                      | 10                                      | 6                                                     | 4.7                                                              | Yes                             | No                          | No                       | 15 <sup>b</sup>                    | 14                                    |
| 687                                      | 3.7                                                                     | 7                      | 9                                       | 4                                                     | 6.6                                                              | Yes                             | Yes                         | Yes                      | 29 <sup>b</sup>                    | 22                                    |
| 792                                      | 3.1                                                                     | 9                      | 12                                      | 6                                                     | 6.8                                                              | Yes                             | Yes                         | No                       | 14 <sup>b</sup>                    | 14 <sup>b</sup>                       |
| 883                                      | 1.0                                                                     | 7                      | 12                                      | 6                                                     | 4.7                                                              | Yes                             | Yes                         | No                       | 21                                 | 21                                    |
| 900                                      | 2.9                                                                     | 7                      | 9                                       | 4                                                     | 4.2                                                              | Yes                             | Yes                         | No                       | 13                                 | 11                                    |
| 902                                      | 2.1                                                                     | 9                      | 12                                      | 6                                                     | 5.8                                                              | Yes                             | Yes                         | No                       | 23                                 | 13                                    |
| 903                                      | 1.0                                                                     | 3                      | 10                                      | 5                                                     | 7.2                                                              | Yes                             | Yes                         | Yes                      | 18                                 | 14                                    |
| 910                                      | 2.7                                                                     | 7                      | 11                                      | 6                                                     | 6.0                                                              | Yes                             | Yes                         | No                       | 15 <sup>b</sup>                    | 15 <sup>b</sup>                       |
| 951                                      | 1.0                                                                     | 5                      | 8                                       | 2                                                     | 6.8                                                              | Yes                             | Yes                         | Yes                      | 14                                 | 11                                    |
| 959                                      | 3.7                                                                     | 9                      | 11                                      | 6                                                     | 7.6                                                              | Yes                             | Yes                         | Yes                      | 19                                 | 13                                    |
| 1027                                     | 2.3                                                                     | 4                      | 7                                       | 2                                                     | 6.9                                                              | Yes                             | Yes                         | Yes                      | 17                                 | 13                                    |
| 1104                                     | 1.0                                                                     | 6                      | 10                                      | 4                                                     | 6.7                                                              | Yes                             | Yes                         | No                       | 20                                 | 12                                    |
| 1105                                     | 1.0                                                                     | 9                      | 19                                      | 14                                                    | 7.3                                                              | Yes                             | Yes                         | Yes                      | 28                                 | 20                                    |
| 1211                                     | 3.1                                                                     | 7                      | 9                                       | 4                                                     | 5.4                                                              | Yes                             | Yes                         | Yes                      | 23                                 | 18                                    |
|                                          | Median/IQR                                                              | Median/IQR             | Median/IQR                              | Median/IQR                                            | Median/IQR                                                       | n, %                            | n, %                        | n, %                     | Median/IQR                         | Median/IQR                            |
|                                          | 2.3 (1.0-3.1)                                                           | 7 (6-9)                | 10 (9-12)                               | 6 (4-6)                                               | 6.6 (5.1-6.9)                                                    | 15 (100%)                       | 13 (87%)                    | 7 (47%)                  | 19 (15-23)                         | 14 (13-20)                            |
| Rebound after no therapy                 |                                                                         |                        |                                         |                                                       |                                                                  |                                 |                             |                          |                                    |                                       |
| ID                                       | Initial viral load nadir (log <sub>10</sub> RNA copies/mL) <sup>a</sup> | Days to initial nadir* | Days to detection of virologic rebound* |                                                       | Viral load peak during rebound (log <sub>10</sub> RNA copies/mL) | Culturable virus during rebound | Any symptoms during rebound | Symptom rebound (TSS ≥3) | Days to final negative viral load* | Days to final negative viral culture* |
| 953                                      | 5.6                                                                     | 4                      | 6                                       |                                                       | 6.2                                                              | Yes                             | Yes                         | Yes                      | 20                                 | 12                                    |

\* Days are from initial positive COVID-19 test

<sup>a</sup> Undetectable viral loads imputed as 1.0 log<sub>10</sub> RNA copies/mL

<sup>b</sup> Final study specimen with detectable viral load or positive viral culture

**Supplement Table 6A.** Validity of symptom rebound to detect virologic rebound in total cohort.

|                      | Symptomatic Rebound | No Symptomatic Rebound | Total |
|----------------------|---------------------|------------------------|-------|
| Virologic Rebound    | 8                   | 8                      | 16    |
| No Virologic Rebound | 19                  | 92                     | 111   |
| Total                | 27                  | 100                    | 127   |

  

|  | Measure                   | Estimate     | 95%CI  |
|--|---------------------------|--------------|--------|
|  | Sensitivity               | 50% (8/16)   | 25-75% |
|  | Positive predictive value | 30% (8/27)   | 14-50% |
|  | Specificity               | 83% (92/111) | 75-89% |
|  | Negative predictive value | 92% (92/100) | 85-96% |

**Supplement Table 6B.** Validity of symptom rebound to detect virologic rebound among individuals receiving nirmatrelvir-ritonavir.

|                      | Symptomatic Rebound | No Symptomatic Rebound | Total |
|----------------------|---------------------|------------------------|-------|
| Virologic Rebound    | 7                   | 8                      | 15    |
| No Virologic Rebound | 12                  | 45                     | 57    |
| Total                | 19                  | 53                     | 72    |

  

|  | Measure                   | Estimate    | 95%CI  |
|--|---------------------------|-------------|--------|
|  | Sensitivity               | 47% (7/15)  | 21-73% |
|  | Positive predictive value | 37% (7/19)  | 16-62% |
|  | Specificity               | 79% (45/57) | 66-89% |
|  | Negative predictive value | 85% (45/53) | 72-93% |

## Supplement References

1. North CM, Barczak A, Goldstein RH, et al. Determining the Incidence of Asymptomatic SARS-CoV-2 Among Early Recipients of COVID-19 Vaccines (DISCOVER-COVID-19): A Prospective Cohort Study of Healthcare Workers Before, During and After Vaccination. *Clin Infect Dis.* 2022 Apr 9;74(7):1275–8.
2. Boucau J, Marino C, Regan J, et al. Duration of Shedding of Culturable Virus in SARS-CoV-2 Omicron (BA.1) Infection. *N Engl J Med.* 2022 Jul 21;387(3):275–7.
3. Boucau J, Uddin R, Marino C, et al. Characterization of Virologic Rebound Following Nirmatrelvir-Ritonavir Treatment for Coronavirus Disease 2019 (COVID-19). *Clin Infect Dis.* 2023 Feb 8;76(3):e526–9.
